1  
2  
3  
4  
5  
6  
7  
8  
9  
10  
11  
12  
13  
14  
15  
16  
17  
18  
19  
20

**Three orphan histidine kinases inhibit *Clostridioides difficile* sporulation**

Adrienne N. Edwards, Daniela Wetzel, Michael A. DiCandia and Shonna M. McBride\*

Department of Microbiology and Immunology, Emory University School of Medicine,  
Emory Antibiotic Resistance Center, Atlanta, GA, USA.

Running Title: Histidine kinases inhibit *C. difficile* sporulation

Key Words: *Clostridioides difficile*, sporulation, spore, anaerobe, histidine kinase,  
Spo0A, phosphotransfer, phosphorylation, phosphorelay, phosphatase

\*Corresponding author. Mailing address: Department of Microbiology and Immunology,  
Emory University School of Medicine, 1510 Clifton Rd, Atlanta, GA 30322. Phone: (404)  
727-6192. Fax: (404) 727-8250. E-mail: shonna.mcbride@emory.edu

21 **ABSTRACT**

22 The ability of the anaerobic gastrointestinal pathogen, *Clostridioides difficile*, to survive  
23 outside the host relies on the formation of dormant endospores. Spore formation is  
24 contingent on the activation of a conserved transcription factor, Spo0A, by  
25 phosphorylation. Multiple kinases and phosphatases regulate Spo0A activity in other  
26 spore-forming organisms; however, these factors are not well conserved in *C. difficile*.  
27 Previously, we discovered that deletion of a conserved phosphotransfer protein,  
28 CD1492, increases sporulation, indicating that CD1492 inhibits *C. difficile* spore  
29 formation. In this study, we investigate the functions of additional conserved orphan  
30 phosphotransfer proteins, CD2492, CD1579, and CD1949 which are hypothesized to  
31 regulate Spo0A phosphorylation. Disruption of the conserved phosphotransfer protein,  
32 CD2492, also increased sporulation frequency, similarly to the *CD1492* mutant, and in  
33 contrast to a previous study. A *CD1492 CD2492* mutant phenocopied the sporulation  
34 and gene expression patterns of the single mutants, suggesting that these proteins  
35 function in the same genetic pathway to repress sporulation. Deletion of the conserved  
36 CD1579 phosphotransfer protein also variably increased sporulation frequency;  
37 however, knockdown of *CD1949* expression did not influence sporulation. We provide  
38 evidence that CD1492, CD2492 and CD1579 function as phosphatases, as mutation of  
39 the conserved histidine residue for phosphate transfer abolished CD2492 function, and  
40 expression of the *CD1492* or *CD2492* histidine site-directed mutants or the wild-type  
41 *CD1579* allele in a parent strain resulted in a dominant negative hypersporulation  
42 phenotype. Altogether, at least three phosphotransfer proteins, CD1492, CD2492 and  
43 CD1579 (herein, PtpA, PtpB and PtpC) repress *C. difficile* sporulation initiation by  
44 regulating activity of Spo0A.

45 **IMPORTANCE**

46 The formation of inactive spores is critical for the long-term survival of the  
47 gastrointestinal pathogen *Clostridioides difficile*. The onset of sporulation is controlled by  
48 the master regulator of sporulation, Spo0A, which is activated by phosphorylation.  
49 Multiple kinases and phosphatases control Spo0A phosphorylation; however, this  
50 regulatory pathway is not defined in *C. difficile*. We show that two conserved  
51 phosphotransfer proteins, CD1492 (PtpA) and CD2492 (PtpB), function in the same  
52 regulatory pathway to repress sporulation by preventing Spo0A phosphorylation. We  
53 show that another conserved phosphotransfer protein, CD1579 (PtpC), also represses  
54 sporulation, and we eliminate the possibility that a fourth orphan histidine kinase protein,  
55 CD1949, impacts *C. difficile* sporulation. These results support the idea that *C. difficile*  
56 inhibits sporulation initiation through multiple phosphatases.

57 **INTRODUCTION**

58 *Clostridioides difficile* undergoes a significant differentiation process to develop dormant  
59 endospores, which enable this anaerobic pathogen to survive outside of the mammalian  
60 gastrointestinal tract for a prolonged period of time. The environmental cues and  
61 regulatory pathways that govern the initiation of sporulation all converge on Spo0A, the  
62 master regulator of sporulation (1-3). Spo0A is a conserved transcriptional regulator  
63 present in all endospore-forming bacteria and is essential to this process (4). Spo0A  
64 activity is controlled by the phosphorylation of an aspartate residue, allowing Spo0A to  
65 directly bind to specific target sequences in the promoters under Spo0A regulation (3, 5,  
66 6). Thus, active Spo0A~P drives transcription of sporulation-specific genes whose  
67 products are required for entry into the sporulation pathway (7, 8).

68 In other spore formers, the opposing activities of numerous orphan histidine  
69 kinases and phosphatases contribute to Spo0A phosphorylation, presumably in  
70 response to environmental stimuli or nutritional cues. In the well-studied soil bacterium,  
71 *Bacillus subtilis*, Spo0A is phosphorylated via an expanded two-component signal  
72 transduction system (TCS), known as a phosphorelay (9). The *B. subtilis* phosphorelay  
73 is comprised of multiple phosphotransfer proteins which transmit a phosphate from one  
74 of several sensor histidine kinases through two phosphotransfer proteins to Spo0A.  
75 Phosphatases directly dephosphorylate Spo0A or a phosphotransfer protein in the  
76 phosphorelay, or inhibit activation and/or autophosphorylation of the sensor histidine  
77 kinases. However, many of the key regulatory proteins that control Spo0A activation in  
78 *B. subtilis* are absent from the *C. difficile* genome (10-12), supporting the hypothesis that  
79 *C. difficile* controls the initiation of sporulation differently than the *Bacillus* sp.

80 The *C. difficile* genome does not encode orthologs of the *Bacillus* species'  
81 phosphotransfer proteins, suggesting that either unique orphan histidine kinases directly  
82 phosphorylate Spo0A or that other proteins transfer the phosphate from the kinases to

83 Spo0A (10). Reinforcing the former hypothesis, orphan histidine kinases promote spore  
84 formation and have been shown to directly phosphorylate Spo0A in Clostridia, including  
85 in *C. acetobutylicum* and *C. perfringens* (13, 14). In *C. difficile*, however, only the  
86 putative sporulation-associated histidine kinase CD1492 has been studied in depth to  
87 ascertain its role in *C. difficile* sporulation (15). A *CD1492* mutant exhibited a  
88 hypersporulation phenotype, had decreased TcdA production, and was significantly less  
89 virulent in the hamster model of *C. difficile* infection (15). Two other annotated  
90 sporulation-associated histidine kinases, the membrane-bound CD2492 and soluble  
91 CD1579, were briefly characterized in a previous study (16). This study showed that a  
92 *CD2492* mutant has a decreased sporulation frequency via microscopy after extended  
93 growth in rich medium and provided evidence that CD1579 directly transferred a  
94 phosphate to Spo0A *in vitro*. However, the conclusions of this study in regards to the  
95 function of either protein were limited.

96         Here, we further probed the function of CD2492 and CD1579 in *C. difficile* spore  
97 formation, as well as asked whether an additional conserved histidine kinase, CD1949,  
98 influences sporulation. Our results revealed that a null *CD2492* single mutant and a  
99 combined *CD1492 CD2492* mutant exhibited the same high sporulation frequency and  
100 increased sporulation-specific gene expression as the *CD1492* mutant, indicating that  
101 these proteins function in the same regulatory pathway. A *CD1579* mutant also exhibited  
102 high, but variable, sporulation phenotype. We demonstrate that mutating the conserved  
103 histidine residues required for phosphate transfer in each of these putative histidine  
104 kinases impact *C. difficile* spore formation in various ways, providing evidence that  
105 phosphate transfer is important for CD1492, CD2492 and CD1579 function. Finally, we  
106 show that CD1949 does not influence *C. difficile* sporulation. Because the functions of  
107 CD1492, CD2492 and CD1579 influence Spo0A phosphorylation, but their phenotypes  
108 do not support their primary activities as Spo0A kinases, we propose to name the

109 corresponding loci phosphotransfer protein A (*ptpA*; *CD1492*), phosphotransfer protein B  
110 (*ptpB*; *CD2492*) and phosphotransfer protein C (*ptpC*; *CD1579*). Together, these three  
111 phosphotransfer proteins prevent *C. difficile* sporulation.

## 112 MATERIALS AND METHODS

113 **Bacterial strains and growth conditions.** The bacterial strains and plasmids used for  
114 this study are listed in **Table 1**. *Clostridioides difficile* strains were routinely cultured in a  
115 37°C anaerobic chamber (Coy) with an atmosphere of 10% H<sub>2</sub>, 5% CO<sub>2</sub> and 85% N<sub>2</sub>, as  
116 previously described (17), either in BHIS or TY medium pH 7.4. *C. difficile* cultures were  
117 supplemented with 2 to 10 µg/ml thiamphenicol if necessary for plasmid maintenance,  
118 and overnight cultures included 0.1% taurocholate to promote spore germination and  
119 0.2% fructose to inhibit sporulation, as indicated (18, 19). *Escherichia coli* strains were  
120 grown at 37°C in LB with 100 µg/ml ampicillin and/or 20 µg/ml chloramphenicol as  
121 indicated, and 50-100 µg/ml kanamycin was used to counterselect against *E. coli* HB101  
122 pRK24 after conjugation with *C. difficile* (20).

123

124 **Strain and plasmid construction.** *C. difficile* 630 (Genbank no. NC\_009089.1) was  
125 used as the template for primer design, and *C. difficile* 630 was used as the template for  
126 PCR amplification and mutant construction. Oligonucleotides used in this study are listed  
127 in **Table 2**. The 630Δ*erm* CD2492 mutant (*ptpB*; MC788) was recreated by retargeting  
128 the group II intron from pCE240 using the targeting site published in Underwood *et al.*  
129 2009 (16). Notably, the targeting site was not located in the 254a site within the CD2492  
130 coding region noted in Underwood *et al.* 2009, but rather at 318s. The CD1492 CD2492  
131 double mutant (*ptpA ptpB*; MC802) was constructed similarly using the 630Δ*erm*  
132 ΔCD1492 (*ptpA*; MC674) background (21). All strains were confirmed with PCR analysis  
133 (**Fig. S1A**).

134 The CD1579 (*ptpC*) mutant was created using the pseudo-suicide allele-coupled  
135 exchange (ACE) vector as previously described (22), with some modifications. A pMSR-  
136 derived vector, pMC919, containing ~740 bp of the upstream and ~500 bp of the  
137 downstream CD1579 homology arms, flanking an *ermB* cassette, was conjugated into

138 630 $\Delta$ *erm* using 15  $\mu$ g/ml thiamphenicol for plasmid selection and 100  $\mu$ g/ml kanamycin  
139 for counterselection of *E. coli*. Faster growing colonies were streaked onto BHIS  
140 supplemented with 10  $\mu$ g/ml thiamphenicol and screened by PCR for upstream or  
141 downstream crossover events. Positive colonies were grown in 10 ml BHIS with 100  
142 ng/ml anhydrotetracycline (ATc) and 5  $\mu$ g/ml erythromycin to induce expression of the  
143 CD2517.1 toxin and cure the plasmid. After 24 hours of growth, 2  $\mu$ l of this culture was  
144 streaked on BHIS agar supplemented with 5  $\mu$ g/ml erythromycin, and colonies were  
145 PCR verified for homologous recombination and thiamphenicol sensitivity (**Fig. S1B**).

146 The *CD1492-H668A* (pMC1000) and *CD2492-H664A* (pMC681) alleles were  
147 synthesized and cloned into pMC123 and pUC19, respectively, by Genscript  
148 (Piscataway, NJ). The Benchling CRISPR Guide RNA Design tool was used to create a  
149 sgRNA targeting *CD1949* (23). The details of vector construction are in the  
150 Supplementary Data (**Fig. S2**).

151

152 **Sporulation assays and phase contrast microscopy.** *C. difficile* strains were grown  
153 overnight in BHIS supplemented with 0.1% taurocholate, to promote spore germination,  
154 and 0.2% fructose, to inhibit sporulation. In the morning, cells were diluted slightly into  
155 BHIS medium and grown until mid-exponential phase (defined as an optical density  
156 [OD<sub>600</sub>] of approximately 0.5). Sporulation was examined on 70:30 agar plates or from  
157 BHI broth, independently. Aliquots of 0.25 ml were either spread as a lawn onto 70:30  
158 agar supplemented with 2  $\mu$ g/ml thiamphenicol (19) or diluted 1:10 into BHI broth.  
159 Ethanol-resistant sporulation assays were performed after 24 h of growth (H<sub>24</sub>) on 70:30  
160 agar or after three days of growth in BHI broth (H<sub>72</sub>), as previously described (15). Cells  
161 were either collected from 70:30 agar and suspended in BHIS medium to an OD<sub>600</sub> of  
162 approximately 1.0 or taken directly from BHI broth. Vegetative cell counts were  
163 determined by immediately serially diluting and plating suspended cells onto BHIS. At



164 the same time, ethanol-resistant spore numbers were ascertained by mixing a 0.5 ml  
165 aliquot of resuspended cells with 0.3 ml ethanol and 0.2 ml dH<sub>2</sub>O to a final concentration  
166 of 28.5% ethanol. This mixture was vortexed and incubated for 15 min to eliminate all  
167 vegetative cells. Ethanol-treated cells were serially diluted in 1X PBS containing 0.1%  
168 taurocholate and plated onto BHIS with 0.1% taurocholate. Colony forming units (CFU)  
169 were enumerated after at least 36 h of growth, and the sporulation frequency was  
170 calculated as the total number of spores divided by the total number of spores and  
171 vegetative cells. A *spo0A* mutant (MC310) was used as a negative control for  
172 sporulation and vegetative cell death. The results represent the means and standard  
173 error of the means for at least three independent biological replicates. Statistical  
174 significance was performed using a one-way ANOVA, followed by Dunnett's multiple-  
175 comparison test (GraphPad Prism v8.3). Phase contrast microscopy was performed at  
176 H<sub>24</sub> or H<sub>72</sub>, using the resuspended cells, with a Ph3 oil immersion objective on a Nikon  
177 Eclipse Ci-L microscope, and at least two fields of view were captured with a DS-Fi2  
178 camera from at least three independent experiments.

179

180 **Quantitative reverse transcription PCR analysis (qRT-PCR).** *C. difficile* were cultured  
181 on 70:30 agar as a lawn as described above. Cells were collected at H<sub>12</sub>, suspended in 6  
182 ml 1:1:2 ethanol:acetone:water solution, and stored at -80°C. RNA was isolated and  
183 subsequently DNase I treated (Ambion) as previously described (24-26). cDNA was  
184 synthesized (Bioline) using random hexamers (26). Quantitative real time-PCR (qRT-  
185 PCR) analysis was performed in triplicate on 50 ng cDNA using the SensiFAST SYBR &  
186 Fluorescein kit (Bioline) and a Roche Lightcycler 96. The results were calculated by the  
187 comparative cycle threshold method (27), were normalized to the *rpoC* transcript, and  
188 represent the means and standard errors of the means for at least three independent

189 biological replicates. Statistical significance was performed using a one-way ANOVA,  
190 followed by a Dunnett's multiple-comparison test (GraphPad Prism v6.0).

191

192 **Enzyme-linked immunosorbent assay (ELISA).** Quantification of TcdA and TcdB toxin  
193 present in culture supernatants were performed on *C. difficile* cultures grown in TY  
194 medium, pH 7.4 at H<sub>24</sub>, as previously described (28). Briefly, cultures were pelleted, and  
195 the supernatants, diluted with the provided dilution buffer, were assayed in technical  
196 duplicates using the tgcBIOMICS kit for simultaneous detection of *C. difficile* toxins A  
197 and B, according to the manufacturer's instructions. The averaged results were  
198 normalized to the OD<sub>600</sub> of each respective culture at H<sub>24</sub>, and the results are provided  
199 as the means and standard errors of the means for three independent biological  
200 replicates. Statistical significance was performed using a one-way ANOVA, followed by a  
201 Dunnett's multiple-comparison test (GraphPad Prism v6.0).

202

203 **Phos-tag gel electrophoresis and western blotting analysis.** *C. difficile* strains were  
204 grown on 70:30 sporulation agar and harvested at H<sub>12</sub>. Lysates were prepared as  
205 previously described (15); however, 0.1% Phosphatase Inhibitor Cocktail II (Sigma) was  
206 included in the lysis buffer to prevent global protein dephosphorylation. Total protein  
207 from lysates was quantitated using the Pierce Micro BCA protein assay kit (Thermo  
208 Scientific). Prior to gel electrophoresis, lysates were prepared at 4°C with the exception  
209 of an additional 630Δ*erm* aliquot that was briefly heated to 99°C before loading to  
210 remove any heat-labile phosphates. Approximately 3 μg of total protein was separated  
211 by electrophoresis on a precast 12.5% Super-Sep Phos-tag SDS-PAGE gel (Fujifilm  
212 Wako Chemicals Inc, USA) at 90 V for 3.5 h at 4°C. Protein was transferred to 0.2 μm  
213 nitrocellulose membrane in transfer buffer containing 10% methanol and 0.04% SDS.  
214 Western blot analysis was performed using mouse anti-Spo0A (19) as the primary

215 antibody and goat anti-mouse conjugated with Alexa 488 (Invitrogen) as the secondary  
216 antibody. Imaging and densitometry were performed with a ChemiDoc and Image Lab  
217 software (Bio-Rad) respectively for three independent experiments.

218 **RESULTS**

219 **The PtpA (CD1492), PtpB (CD2492) and PtpC (CD1579) orphan histidine kinases**

220 **inhibit *C. difficile* spore formation.** The *C. difficile* 630 genome encodes five orphan  
221 histidine kinases, *CD1492*, *CD2492*, *CD1579*, *CD1949*, and *CD1352* which contain  
222 conserved catalytic domains that share similarity to *Bacillus* sp. sporulation-associated  
223 kinases (16, 29). The *CD1352* kinase (CprK) governs a lantibiotic-responsive transporter  
224 with no sporulation phenotype and thus, was not included in this study (30). A previous  
225 study found that disruption of *CD2492* resulted in decreased sporulation frequency while  
226 *in vitro* studies suggested that *CD1579* directly phosphorylated Spo0A (16). Our  
227 previous work implicated *CD1492* as an inhibitor of sporulation, as the sporulation  
228 frequency of a *CD1492* mutant was significantly greater than the parent strain (15). To  
229 further investigate the impact of these four orphan histidine kinases in *C. difficile*  
230 sporulation, we recreated the previously published *CD2492* mutant. We retargeted the  
231 group II intron from pCE240 utilizing the same *CD2492* targeting site used by  
232 Underwood *et al.* to create a *CD2492* mutant (referred to as the *ptpB* mutant). In  
233 addition, we created a *CD1492 CD2492* double mutant (referred to as the *ptpA ptpB*  
234 mutant) by introducing the *CD2492*-targeted group II intron into the *CD1492* background  
235 (see Materials and Methods for details and the PCR confirmation in **Fig. S1**; the original  
236 *CD1492* mutant is referred to as the *ptpA* mutant herein).

237 We assessed the sporulation phenotypes of the *ptpA*, *ptpB* and *ptpA ptpB*  
238 mutants by enumerating ethanol-resistant spores and vegetative cells after 24 h of  
239 growth on 70:30 sporulation agar. In these conditions, the 630 $\Delta$ *erm* parent sporulated at  
240 a frequency of ~15.5%. As previously observed, the *ptpA* mutant exhibited a high  
241 sporulation frequency of 84.4% (15; Fig. 1A). The *ptpB* mutant and the *ptpA ptpB* double  
242 mutant exhibited the same high sporulation frequencies as the *ptpA* mutant (83.6% and  
243 83.7%, respectively; **Fig. 1A**), indicating that the individual genes do not have an

244 additive impact on sporulation. These results suggest that PtpA and PtpB function in the  
245 same regulatory pathway to inhibit spore formation. These sporulation phenotypes are  
246 also apparent by phase contrast microscopy, as more phase-bright spores were visible  
247 in the *ptpA*, *ptpB* and *ptpA ptpB* mutants compared to the parent strain (**Fig. 1B**).

248 Based on previous results, we hypothesized that the activity of RstA, a  
249 multifunctional regulator that positively influences sporulation (31), may be linked to PtpA  
250 (CD1492) activity, as the gene expression profiles and sporulation phenotypes of *rstA*  
251 and *ptpA* mutants are opposite (15). Because of both this inverse correlation and the  
252 observation that the *ptpB* and *ptpA ptpB* mutants phenocopy the *ptpA* mutant, we  
253 included the *rstA* mutant in this study as a comparator. As previously observed, the *rstA*  
254 mutant exhibited a significantly low sporulation frequency compared to the parent (**Fig.**  
255 **1A and B**).

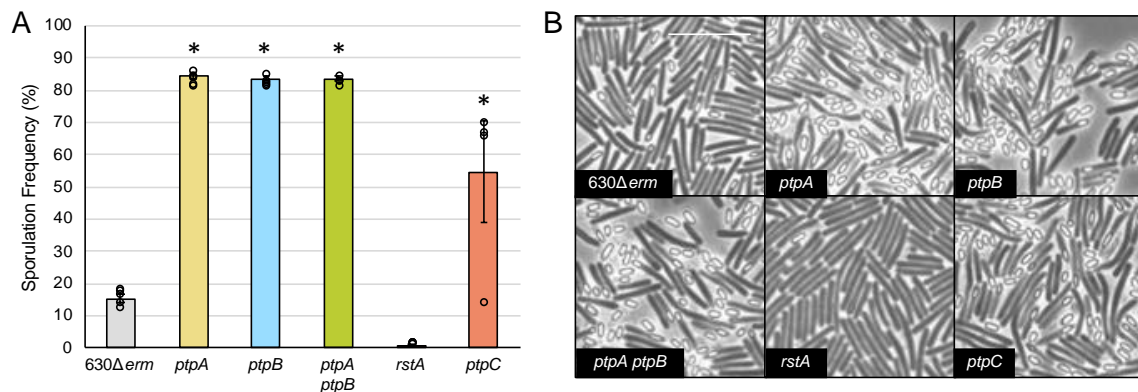

256

257 **Figure 1. The phosphotransfer proteins PtpA (CD1492), PtpB (CD2492) and PtpC**  
258 **(CD1579) inhibit *C. difficile* spore formation.** (A) Ethanol-resistant spore formation  
259 and (B) representative phase contrast micrographs of 630Δ*erm*, *ptpA* (MC674), *ptpB*  
260 (MC788), *ptpA ptpB* (MC802), *rstA* (MC1118), and *ptpC* (MC1646) grown on 70:30  
261 sporulation agar at H<sub>24</sub> (defined as 24 h growth on plates). Sporulation frequency is  
262 calculated as the number of ethanol-resistant spores divided by the total number of  
263 spores and vegetative cells enumerated. The white scale bar represents 1 μm. \*, *P* ≤  
264 0.01 by a one-way ANOVA followed by Dunnett's multiple comparisons test.

265 To investigate the impact of PtpC (CD1579) on *C. difficile* sporulation, we created  
266 a clean deletion using allele-coupled exchange with a toxin-antitoxin system as a  
267 counter-selectable marker to select for plasmid excision (22). Sporulation frequency in

268 the *CD1579* mutant was variable, but ~3.5-fold greater than the *630Δerm* parent at  
269 54.8% (**Fig. 1A, B**). This result was somewhat surprising given that PtpC was previously  
270 shown to directly phosphorylate Spo0A *in vitro* (16); however, it is not uncommon to  
271 observe both kinase and phosphatase activity *in vitro*, even though one direction of  
272 phosphate flow is preferred *in vivo* (9). These data suggest that PtpC also inhibits *C.*  
273 *difficile* sporulation, but may not be in the primary regulatory pathway controlling Spo0A  
274 dephosphorylation in the conditions tested.

275 Notably, the sporulation phenotype we observed in the *ptpB* mutant is the  
276 opposite of previously published results (16). When Underwood *et al.* created the  
277 original *ptpB* mutant, the sporulation frequencies were calculated after 72 h of growth in  
278 BHI broth by directly counting carbol fuchsin and malachite green-stained bright-field  
279 micrographs. No additional experiments were performed to further probe the sporulation  
280 phenotype in the *ptpB* mutant, nor were complementation studies performed (16). We  
281 asked whether the *ptpA*, *ptpB*, and *ptpA ptpB* mutants exhibit an alternative sporulation  
282 phenotype under different growth conditions. We replicated the sporulation assays  
283 performed in BHI medium; however, to quantitate sporulation efficiency, we used the  
284 standard ethanol-resistance sporulation assays to enumerate spores, and we assessed  
285 sporulation by phase contrast microscopy. The *ptpA*, *ptpB*, and *ptpA ptpB* mutants all  
286 hypersporulated in BHI medium (**Fig. 2A**), similar to the sporulation phenotypes  
287 observed on 70:30 sporulation agar. Due to the significant amount of cell lysis observed  
288 in the phase contract micrographs (**Fig. 2B**), vegetative cells could not be accurately  
289 enumerated at this time point from BHI cultures. Thus, the sporulation frequency was  
290 counted as spores per ml of

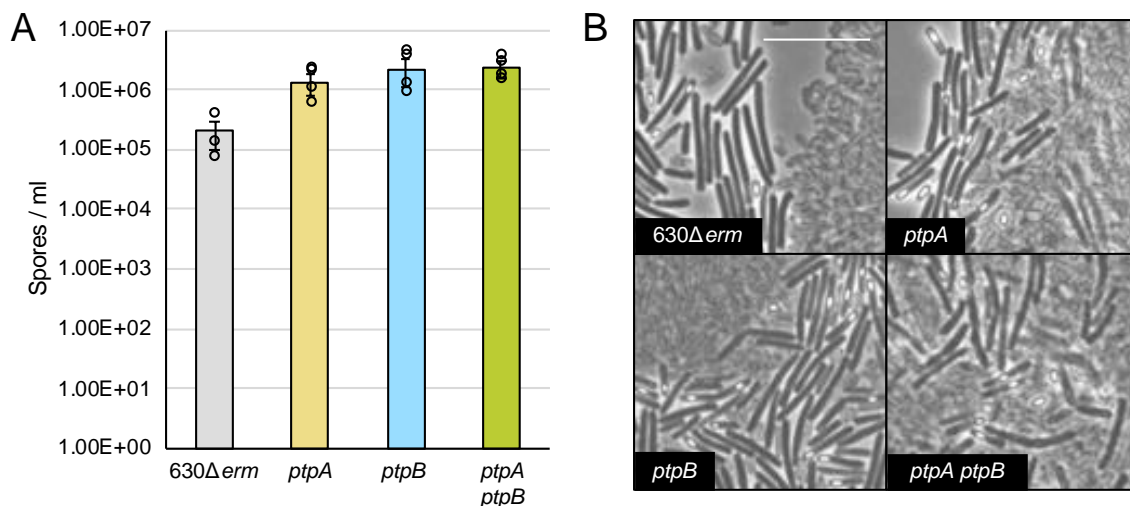

291

292 **Figure 2. The sporulation frequencies of the *ptpA* (CD1492), *ptpB* (CD2492) and**  
293 ***ptpA ptpB* (CD1492 CD2492) mutants are increased in BHI medium compared to**  
294 **the parent strain. (A) Ethanol-resistant spore formation and (B) representative phase**  
295 **contrast micrographs of 630Δ*erm*, *ptpA* (MC674), *ptpB* (MC788) and *ptpA ptpB* (MC802)**  
296 **grown in BHI medium at H<sub>72</sub>. The means and standard errors of the means for three**  
297 **biological replicates are shown. The white scale bar represents 1 μm. No statistical**  
298 **significance observed via a one-way ANOVA followed by Dunnett's multiple**  
299 **comparisons test.**

300

301 culture. These data suggest that the original *ptpB* (low sporulation) phenotype observed  
302 by Underwood *et al.* was inaccurate, likely due to the significant cell lysis present after  
303 72 h in BHI. Altogether, our data demonstrate that PtpA and PtpB inhibit *C. difficile*  
304 sporulation.

305

306 **CRISPR*i* knockdown of CD1949 expression does not affect *C. difficile* spore**

307 **formation.** We next asked whether the orphan histidine kinase CD1949 contributes to

308 *C. difficile* sporulation. After numerous unsuccessful attempts to create a *CD1949* null

309 mutant, we utilized the CRISPR interference (CRISPR*i*) tool recently adapted for *C.*

310 *difficile*, to directly repress *CD1949* transcription (23). Here, the addition of xylose to the

311 medium induced expression of the *dCas9* gene, which encodes a nuclease-deactivated

312 version of caspase-9. *dCas9* is then guided to the target transcript by a gene-specific

313 single guide RNA (sgRNA) and subsequently blocks gene transcription. We constructed

314 two different *CD1949*-specific sgRNAs and expressed these in the 630 $\Delta$ *erm*  
315 background. A previously published scrambled sgRNA (sgRNA-*neg*) was included as a  
316 control (23). No difference in sporulation frequencies was observed between strains  
317 containing the sgRNA-*CD1949* targets compared to the sgRNA-*neg*-containing strain  
318 grown on sporulation agar, with or without xylose (**Fig. 3A**). To ensure that *CD1949* was  
319 directly targeted by our sgRNA constructs, we measured *CD1949* transcripts using qRT-  
320 PCR. *CD1949* transcripts were decreased by ~10-fold or ~20-fold using sgRNA-*CD1949-1*  
321 or sgRNA-*CD1949-3*, respectively (**Fig. 3B**). These data suggest that *CD1949* does not  
322 play a role in controlling *C. difficile* sporulation.

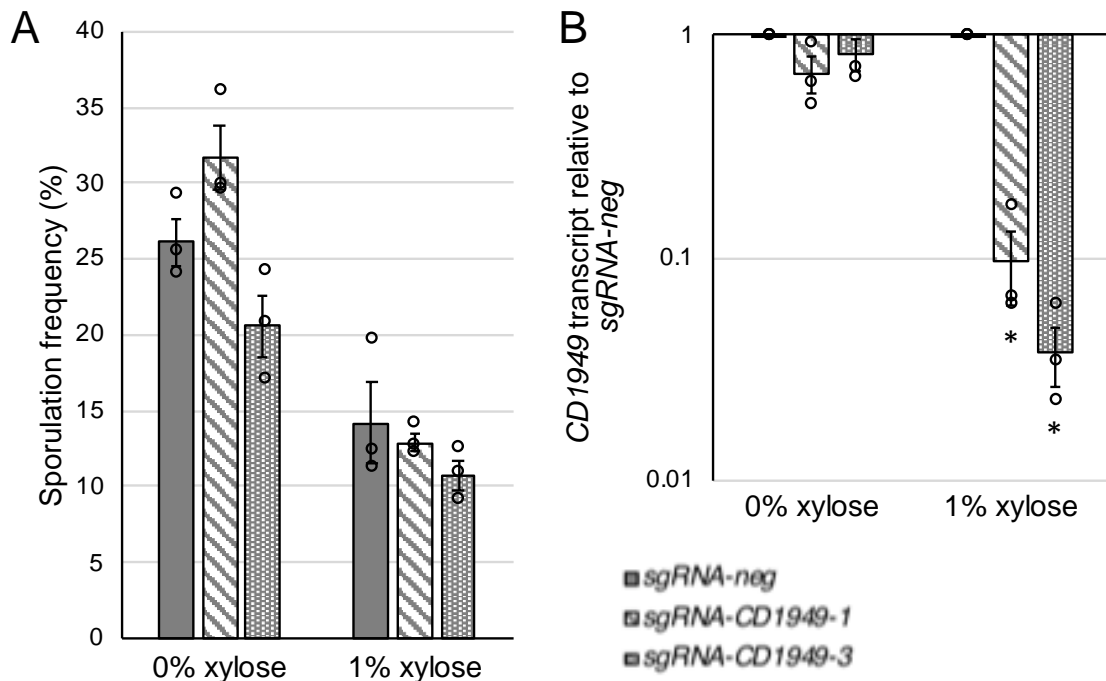

323

324 **Figure 3. CRISPRi knockdown of *CD1949* gene expression does not affect**  
325 **sporulation frequency.** (A) Ethanol-resistant spore formation at H<sub>24</sub> and (B) qRT-PCR  
326 analysis of *CD1949* transcript levels at H<sub>12</sub> in 630 $\Delta$ *erm* strains expressing either a  
327 scrambled single guide RNA (sgRNA-*neg*) or sgRNAs targeting *CD1949* (sgRNA-  
328 *CD1949-1* and -3) grown on 70:30 agar supplemented with thiamphenicol 2  $\mu$ g/ml +/-  
329 1% xylose. Sporulation frequency is calculated as the number of ethanol-resistant  
330 spores divided by the total number of spores and vegetative cells enumerated. The  
331 means and standard errors of the means for three biological replicates are shown. \*, *P*  
332  $\leq 0.001$  by a one-way ANOVA followed by Dunnett's multiple comparisons test.



333 **Deletion of *ptpA* (CD1492) and *ptpB* (CD2492) results in increased sporulation-**  
334 **specific gene expression and Spo0A activation.** To further characterize the  
335 sporulation phenotypes of the phosphotransfer protein mutants, we utilized qRT-PCR to  
336 measure transcript levels of sporulation-specific genes during the initiation of sporulation  
337 at 12 h of growth on sporulation agar (H<sub>12</sub>). We examined expression of *sigF*, encoding  
338 the early sporulation forespore-specific sigma factor, *sigE*, which encodes the early  
339 mother cell-specific sigma factor, and *spo0A*. The *ptpA*, *ptpB*, and *ptpA ptpB* mutants all  
340 presented similarly increased *sigF* (~2.1-2.4-fold) and *sigE* (~1.8-2.1-fold) transcript  
341 levels (**Fig. 4A**). As previously observed, the *rstA* mutant had fewer *sigF*, *sigE* and  
342 *spo0A* transcripts compared to the parent strain (31; Fig. 4A). Although the *ptpC* mutant  
343 had a higher sporulation frequency than the 630Δ*erm* parent at H<sub>24</sub>, sporulation-specific  
344 gene expression was not significantly increased by H<sub>12</sub>.

345 To determine whether Spo0A phosphorylation was affected during early  
346 sporulation in the phosphotransfer protein mutants, we employed phos-tag SDS-  
347 polyacrylamide gel electrophoresis. Here, total protein, harvested from cells after 12 h of  
348 growth on sporulation agar, was resolved by phos-tag gel electrophoresis. The  
349 unphosphorylated (Spo0A) and phosphorylated (Spo0A~P) forms were then detected by  
350 western blot with Spo0A antibody. As a control, an aliquot of 630Δ*erm* lysate was boiled  
351 to remove any heat-labile phosphate modifications. The protein representing the upper  
352 band is the Spo0A~P species, as evidenced by the loss of this upper band after heating  
353 (**Fig. 4B**, lane 1 compared to lane 2). There was an increase in the ratio of Spo0A~P to  
354 Spo0A in the *ptpA*, *ptpB*, *ptpA ptpB*, and *ptpC* mutants, confirming that a greater  
355 proportion of Spo0A protein was phosphorylated in these mutants, corresponding to the  
356 onset of sporulation (**Fig. 4B**). Likewise, a much lower ratio of Spo0A~P to Spo0A was  
357 observed in the *rstA* mutant, also correlating with the decreased sporulation-specific  
358 gene

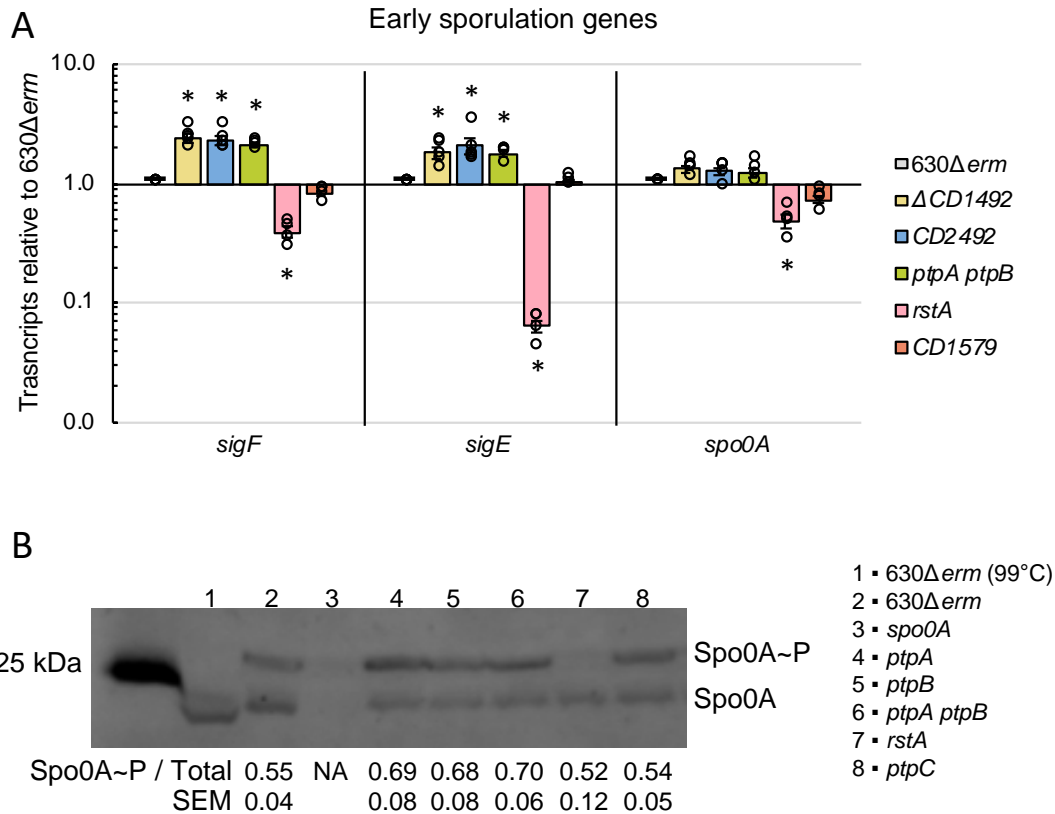

359

360 **Figure 4. Spo0A-dependent gene expression and Spo0A activation in**  
 361 **phosphotransfer protein mutants correlate with endpoint sporulation frequency.**  
 362 (A) qRT-PCR analyses of *sigE*, *sigF* and *spo0A* transcripts and (B) anti-Spo0A western  
 363 blot (brightness adjusted) after phos-tag gel separation of unphosphorylated and  
 364 phosphorylated Spo0A (Spo0A~P) species in 630Δerm, *ptpA* (CD1492; MC674), *ptpB*  
 365 (CD2492; MC788), *ptpA ptpB* (CD1492 CD2492; MC802), *rstA* (MC1118), and *ptpC*  
 366 (CD1579; MC1646) grown on 70:30 sporulation agar at H<sub>12</sub>. The means and standard  
 367 errors of the means for at least three biological replicates are shown. \*, *P* ≤ 0.05 by a  
 368 one-way ANOVA followed by Dunnett's multiple comparisons test.

369

370 expression and lower sporulation frequency observed in this mutant. Altogether, these  
 371 data corroborate that PtpA, PtpB, PtpC and RstA all affect Spo0A phosphorylation and  
 372 thus, early sporulation events in *C. difficile*.

373

374 **PtpA (CD1492) and PtpB (CD2492) promote TcdA production.** Our previous work  
 375 demonstrated that the *ptpA* mutant had a ~2-fold decrease in *tcdA* transcript and TcdA  
 376 protein levels compared to the 630Δerm parent (15). We observed no change in *tcdB*

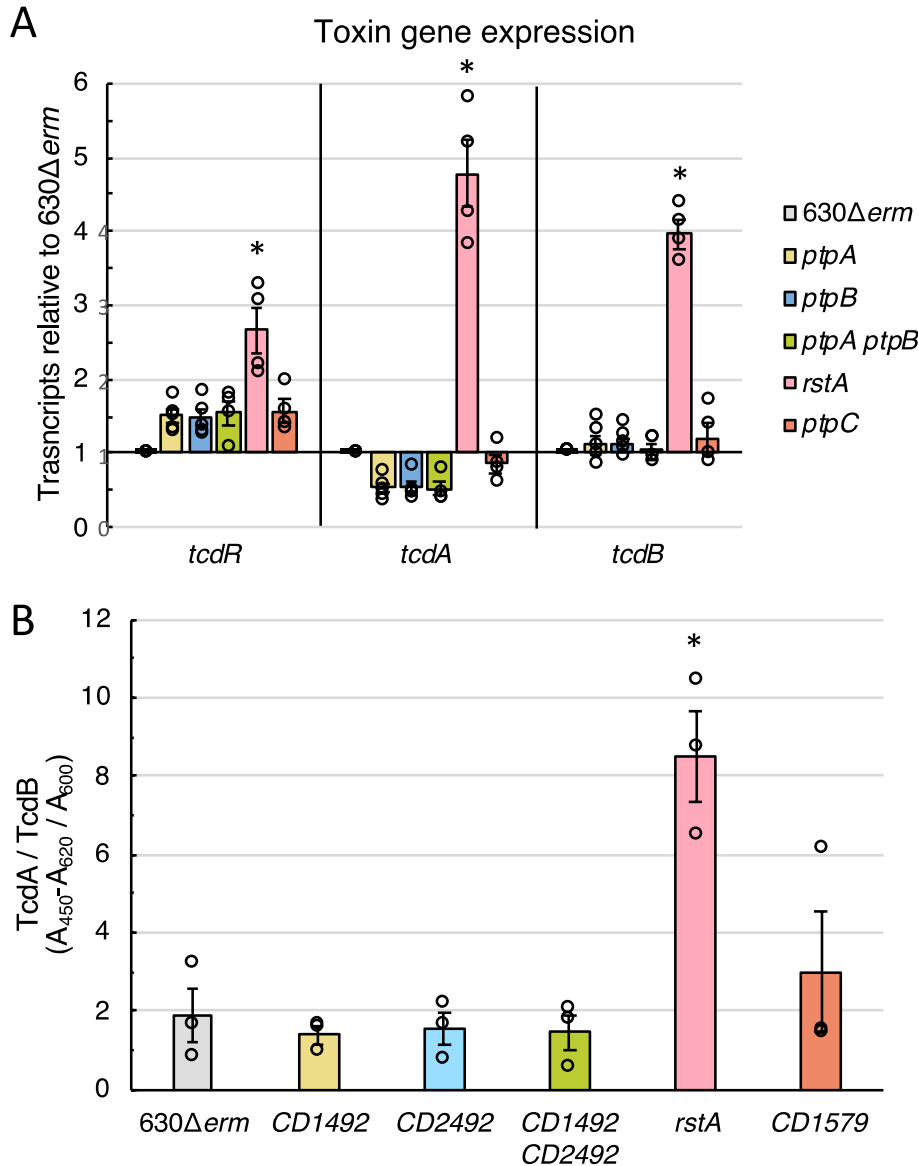

377

378

379 **Figure 5. PtpA (CD1492) and PtpB (CD2492) promote TcdA production.** (A) qRT-

380 PCR analyses of *tcdR*, *tcdA* and *tcdB* transcript levels at H<sub>12</sub> in 70:30 sporulation agar

381 and (B) ELISA analysis of TcdA and TcdB present in the supernatant at H<sub>24</sub> in TY

382 medium in 630Δerm, *ptpA* (MC674), *ptpB* (MC788), *ptpA ptpB* (MC802), *rstA* (MC1118),

383 and *ptpC* (MC1646). The means and standard errors of the means for at least three

384 biological replicates are shown. \*,  $P \leq 0.05$  by a one-way ANOVA followed by Dunnett's

385 multiple comparisons test.

386 transcript levels in the *ptpA* strain. To determine whether PtpB and PtpC impact toxin

387 production, we measured *tcdA*, *tcdB* and *tcdR* transcript levels in cells grown on 70:30

388 sporulation agar at H<sub>12</sub> using qRT-PCR. As we observed previously (15), the *ptpA*

389 mutant exhibited a ~2-fold decrease in *tcdA* transcript levels, but no significant change in

390 *tcdR* or *tcdB* transcripts was observed (**Fig. 5A**). The *ptpB* and *ptpA ptpB* mutants  
391 mirrored the changes in toxin transcripts seen in the *ptpA* mutant, exhibiting an ~2-fold  
392 decrease in *tcdA* transcript levels, with no effect on *tcdR* and *tcdB* transcript levels (**Fig.**  
393 **5A**). Toxin transcript levels were not greatly impacted by the loss of *ptpC*, and as we  
394 previously observed, the absence of *rstA* resulted in significantly increased *tcdR*, *tcdA*  
395 and *tcdB* transcripts, as RstA is a direct repressor of toxin gene transcription (31, 32).

396 To further understand the impact that the phosphotransfer proteins exert on toxin  
397 production, we measured TcdA and TcdB present in the supernatants of the *ptp* mutants  
398 after 24 h growth in TY medium. There was a slight decrease in total toxin production in  
399 the *ptpA*, *ptpB* and *ptpA ptpB* mutants, but this effect was not statistically significant (**Fig.**  
400 **5B**). Considering the qRT-PCR data, it is likely that the wild-type levels of *tcdB*  
401 transcription in the mutants offset the decrease in *tcdA* transcription. Since this ELISA  
402 measures the presence of both toxins, the unchanged levels of TcdB in these mutants  
403 may mask the repression of TcdA production.

404 Similar to the variable increase in sporulation frequency in the *ptpC* mutant, we  
405 also observed variable concentrations of total TcdA and TcdB toxin present in the  
406 supernatant (**Fig. 5B**), suggesting that PtpC does not play a primary role in *C. difficile*  
407 toxin production. As expected, TcdA and TcdB toxin were significantly increased in the  
408 *rstA* mutant supernatant (31, 32; Fig. 5B).

409 Although the decrease in *tcdA* transcripts and TcdA/TcdB toxin production in the  
410 *ptp* single and double mutants are not statistically significant in this study, we previously  
411 found that the decreased TcdA production in the *ptpA* mutant resulted in decreased  
412 virulence in the hamster model of infection (15). These data suggest that both PtpA and  
413 PtpB enhance *C. difficile* virulence by indirectly promoting *tcdA* transcription through an  
414 unknown mechanism. Further, these data comparing the single mutants to the double  
415 mutant provide additional support that PtpA and PtpB function in the same regulatory

416 pathway to influence *C. difficile* physiological processes, as the toxin phenotypes in the  
417 single and double mutants are all identical.

418

419 **PtpA (CD1492) and PtpB (CD2492) are both required for repression of *C. difficile***  
420 **sporulation, but the conserved histidine residue is not required for PtpB (CD2492)**

421 **function.** To ensure that the sporulation phenotypes exhibited by the *ptpA*, *ptpB*, *ptpA*  
422 *ptpB*, and *ptpC* mutants were due to disruption or loss of the targeted gene, we  
423 complemented these mutants by expressing each locus under the control of its native  
424 promoter on an exogenous plasmid. Expression of *ptpA* or *ptpB* from their native  
425 promoters restored the *ptpA* and *ptpB* single mutants' sporulation frequencies to below  
426 wild-type levels (**Fig. 6A**). However, expressing *ptpA* in the *ptpB* mutant or *ptpB* in the  
427 *ptpA* mutant did not complement sporulation, further supporting that PtpA and PtpB  
428 functions are not redundant (**Fig. 6A**). Complementation of the *CD1492 CD2492* double  
429 mutant required the expression of both *ptpA* and *ptpB*; expression of a single  
430 phosphotransfer protein in the double mutant was not enough to exert any impact on  
431 sporulation frequency (**Fig. 6A**). Altogether, these data indicate that PtpA and PtpB  
432 function together in a regulatory pathway to inhibit spore formation and that their  
433 functions are not interchangeable.

434         The autophosphorylation and phosphotransferase activities of sensor histidine  
435 kinases rely on a conserved histidine residue located in the dimerization and histidine  
436 phosphotransfer domain (DHpt) (33, 34). These conserved histidine residues are  
437 present in PtpA, PtpB, and PtpC and were proposed to be critical for phosphotransfer to  
438 an aspartyl residue in Spo0A (16). Replacing the conserved histidine residue with  
439 alanine in

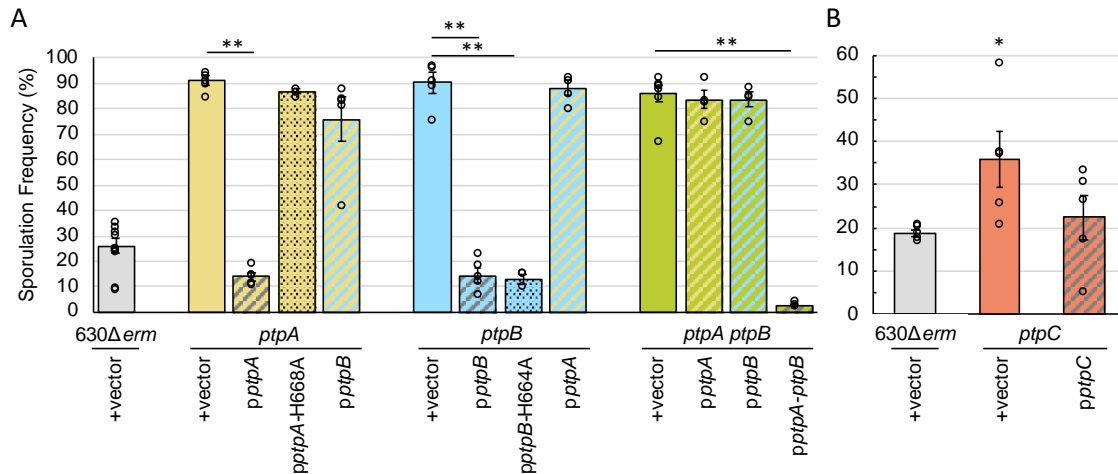

440

441 **Figure 6. PtpA (CD1492) and PtpB (CD2492) are both required for repression of *C.***  
 442 ***difficile* sporulation, but the conserved histidine residue is not required for PtpB**  
 443 **(CD2492) function.** Ethanol-resistant spore formation in (A) 630Δerm pMC123 (MC324)  
 444 *ptpA* pMC123 (MC964), *ptpA p ptpA* (MC998), *ptpA p ptpA-H668A* (MC1812), *ptpA p ptpB*  
 445 (MC965), *ptpB* pMC123 (MC966), *ptpB p ptpB* (MC967), *ptpB p ptpB-H664A* (MC1030),  
 446 *ptpB p ptpA* (MC999), *ptpA ptpB* pMC123 (MC968), *ptpA ptpB p ptpA* (MC1000), *ptpA*  
 447 *ptpB p ptpB* (MC969), and *ptpA ptpB p ptpA-ptpB* (MC1396) and (B) 630Δerm pMC123  
 448 (MC324), *ptpC* pMC123 (MC1672), and *ptpC p ptpC* (MC1673) grown on 70:30  
 449 sporulation agar supplemented with 2 μg/ml thiamphenicol at H<sub>24</sub>. Sporulation frequency  
 450 is calculated as the number of ethanol-resistant spores divided by the total number of  
 451 spores and vegetative cells enumerated. The means and standard errors of the means  
 452 for at least four biological replicates are shown. Note the difference in scales between  
 453 panels A and B. \*,  $P \leq 0.05$ ; \*\*,  $P \leq 0.001$  by a one-way ANOVA followed by Dunnett's  
 454 multiple comparisons test.

455

456 a histidine kinase disables the autophosphorylation and phosphotransfer activity of the  
 457 protein, resulting in a nonfunctional protein (35). Our previous work showed that  
 458 overexpression of *ptpA-H668A* in the *ptpA* background did not reduce sporulation (15),  
 459 suggesting that the histidine residue is critical for CD1492 function in sporulation. We  
 460 were able to replicate these results by expressing *ptpA-H668A* from its native promoter,  
 461 rather than the inducible promoter used previously (Fig. 6A). Surprisingly, the  
 462 corresponding *ptpB-H664A* allele did complement the *ptpB* mutant (Fig. 6A), indicating  
 463 that this histidine residue is not necessary for PtpB to repress sporulation.

464 To confirm that the *ptpC* mutation was responsible for the hypersporulation  
465 phenotype observed, the *ptpC* gene was expressed from its native promoter on an  
466 exogenous plasmid. Although the sporulation phenotypes were variable in the *ptpC*  
467 strains harboring the control and the *pptpC* plasmids, we did observe an ~1.6-fold  
468 reduction in sporulation frequency in the *ptpC pptpC* complementation strain compared  
469 to *ptpC* containing the vector control (**Fig. 6B**). Because of the variable phenotype, we  
470 performed whole genome sequencing on the *ptpC* mutant and found no additional  
471 mutations besides the replacement of the *ptpC* allele with the *ermB* cassette (data not  
472 shown).

473

474 **Expression of the *ptp* site-directed mutants result in a dominant negative**  
475 **phenotype.** To further probe the function of the conserved histidine residues, we  
476 expressed the *ptpA*, *ptpB* and *ptpC* wild-type alleles and histidine site-directed mutations  
477 from their native promoters in the  $630\Delta erm$  background. Comparable to our previous  
478 study (15), sporulation frequency decreased when *ptpA* was expressed from its native  
479 promoter, compared to the parent strain containing the empty vector (**Fig. 7A, B**; from  
480 33.3% in  $630\Delta erm$  pMC123 to 14.4% in  $630\Delta erm pptpA$ ). We observed a similar effect  
481 when *ptpB* was expressed in  $630\Delta erm$  (**Fig. 7A, B**; to 16.0% in  $630\Delta erm pptpB$ ),  
482 indicating that PtpA and PtpB are able to reduce sporulation in an otherwise wild-type  
483 background.

484 Since histidine kinases function as oligomers, we next hypothesized that  
485 expression of the nonfunctional *ptpA-H668A* allele in the parental background would  
486 result in nonfunctional hetero-oligomers. These hetero-oligomers would be unable to  
487 function as a phosphatase, resulting in increased sporulation and a dominant negative  
488 phenotype. As predicted, sporulation frequency increased in  $630\Delta erm pptpA-H668A$  by  
489 ~1.7-fold compared to the parent strain (**Fig. 7A, B**). Although the *ptpB-H664A* allele

490 complemented the *ptpB* mutant, we also observed a dominant negative phenotype when  
491 *pptpB-H664A* was expressed in  $630\Delta erm$ , as sporulation frequency increased  $\sim 1.9$ -fold  
492 (Fig. 7A, B). In contrast to the complementation study (Fig. 6A), these data suggest that  
493 the conserved histidine residue of PtpB plays a role in *C. difficile* sporulation.

494 Finally, we examined the effect on sporulation when *ptpC* is expressed in the  
495  $630erm$  background. Although not statistically significant because of variability, spore  
496 formation was increased by  $\sim 2$ -fold when the wild-type *ptpC* allele was expressed in  
497  $630\Delta erm$  (Fig. 7A, C). However, sporulation frequency was increased by only  $\sim 1.3$ -fold  
498 when the *ptpC-H372A* allele was expressed, suggesting that the histidine residue  
499 impacts the ability for PtpC to influence *C. difficile* spore formation.

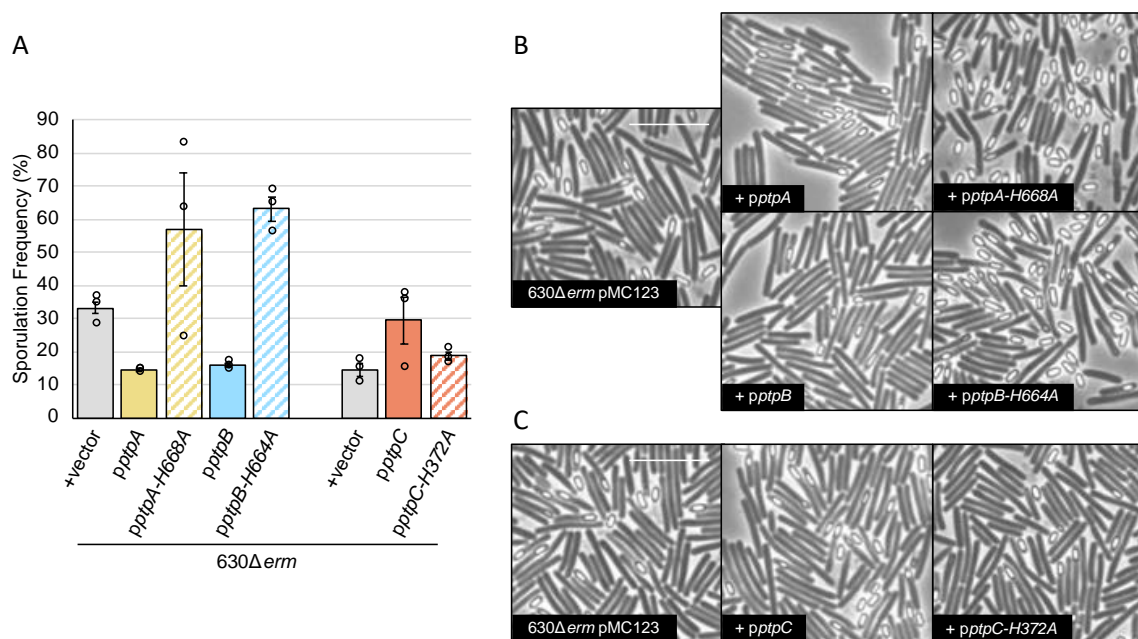

500  
501 **Figure 7. *ptpA* (CD1492) and *ptpB* (CD2492) expression in the  $630\Delta erm$**   
502 **background decreases sporulation frequency, while *ptpA-H668A* and *ptpB-H664A***  
503 **expression results in a dominant negative phenotype. (A)** Ethanol-resistant spore  
504 formation and representative phase contrast micrographs in (B, C)  $630\Delta erm$  pMC123  
505 (MC324),  $630\Delta erm$  *pptpA* (MC2024),  $630\Delta erm$  *pptpA-H668A* (MC2025),  $630\Delta erm$  *pptpB*  
506 (MC2026),  $630\Delta erm$  *pptpB-H664A* (MC2027),  $630\Delta erm$  *pptpC* (MC2030),  $630\Delta erm$   
507 *pptpC-H372A* (MC2031) grown on 70:30 sporulation agar supplemented with 2  $\mu$ g/ml  
508 thiamphenicol at H<sub>24</sub>. Experiments with *ptpA* and *ptpB* were performed at different times  
509 than with *ptpC*, and the  $630\Delta erm$  pMC123 (MC324) control strain is shown for each.  
510 Sporulation frequency is calculated as the number of ethanol-resistant spores divided by  
511 the total number of spores and vegetative cells enumerated. The means and standard  
512 errors of the means for three biological replicates are shown. The white scale bar



513 represents 1  $\mu$ m. \*,  $P \leq 0.05$  by a one-way ANOVA followed by Dunnett's multiple  
514 comparisons test comparing each strain to 630 $\Delta$ *erm* pMC123 (MC324).

515 **DISCUSSION**

516 Although the morphological changes that produce a dormant spore are conserved  
517 between Clostridia and the well-studied Bacilli, the regulatory pathway and factors that  
518 control sporulation initiation in *C. difficile* are not well defined (10-12). In all spore-  
519 forming bacteria, the onset of sporulation is governed by the essential regulator of  
520 sporulation, Spo0A, which is activated by phosphorylation and inactivated by  
521 dephosphorylation (10, 36). The broadly studied *Bacillus* sp. use an expanded two-  
522 component system, known as a phosphorelay, to transfer a phosphate signal from  
523 sporulation-associated sensor histidine kinases via two phosphotransfer proteins to  
524 Spo0A, to trigger the onset of sporulation. An orthologous expanded sporulation  
525 regulatory pathway leading to Spo0A activation is not encoded in the *C. difficile* genome  
526 or other Clostridia (7, 10, 12); however, several orphan sensor histidine kinases,  
527 including CD1492, CD2492 and CD1579, have been implicated in controlling sporulation  
528 initiation by influencing Spo0A phosphorylation (15, 16).

529 This investigation has expanded what was previously known about how CD1492  
530 (PtpA), CD2492 (PtpB) and CD1579 (PtpC) impact *C. difficile* spore formation (15, 16).  
531 The data demonstrate that PtpA and PtpB function in the same regulatory pathway to  
532 control Spo0A activation, as the sporulation phenotypes and gene expression profiles of  
533 the single and double mutants are identical. However, neither protein can fulfill the role  
534 of the other, indicating that PtpA and PtpB functions are nonredundant. Further, the data  
535 suggest that these proteins function together, not necessarily stepwise, as neither  
536 protein is epistatic to the other. It is possible that PtpA and PtpB form hetero-oligomers  
537 and/or do not function as phosphatases without both proteins present. We hypothesize  
538 that PtpA and PtpB directly bind to and dephosphorylate Spo0A, although alternatively,  
539 PtpA and PtpB may interact with an intermediate factor(s) that directly phosphorylates  
540 Spo0A or serve as an endpoint in a serial dephosphorylation pathway. We attempted to

541 assess potential direct protein-protein interactions by using tagged, full-length proteins in  
542 previously validated bacterial adenylate cyclase two hybrid (BACTH) and split luciferase  
543 assays (37, 38). However, these approaches have been unsuccessful thus far, likely  
544 because PtpA and PtpB are membrane proteins that are toxic when expressed in *E. coli*,  
545 resulting in unstable constructs. We also unsuccessfully attempted to capture these  
546 interactions *in vivo* with co-immunoprecipitation assays using dually-tagged full-length  
547 recombinant proteins, followed by western blotting. In future studies, we will employ  
548 alternative approaches, such as working with cytosolic PtpA and PtpB truncations (14,  
549 34, 39) and performing co-immunoprecipitation studies followed by mass spectrometry  
550 analyses. Identifying the direct binding partners of these phosphotransfer proteins is a  
551 high priority.

552         The role of PtpC in sporulation is less clear. A *ptpC* null mutant had increased,  
553 but variable, sporulation. In contradiction, overexpression of *ptpC* in 630 $\Delta$ *erm* also  
554 increased sporulation frequency. But, expression of the *ptpC-H372A* allele had no  
555 impact on sporulation. PtpC was previously shown to phosphorylate Spo0A *in vitro*,  
556 suggesting that PtpC positively controls *C. difficile* sporulation initiation (16). However,  
557 the contribution of the conserved PtpC histidine residue for *in vitro* phosphate transfer to  
558 Spo0A was not tested. These data suggest that PtpC has the ability to perform both  
559 kinase and phosphatase functions.

560         The environmental and/or intracellular signals that control the activities of PtpA,  
561 PtpB and PtpC are unknown. These proteins may have kinase or phosphatase activity  
562 under differing conditions, similar to the well-studied EnvZ histidine kinase of *Escherichia*  
563 *coli* and *Salmonella enterica* (33, 34), the pH-sensing HK853 from *Thermotoga maritima*  
564 (40), and the quorum sensing sensor kinases of *Vibrio* sp., LuxN and LuxQ (41, 42).  
565 LuxN requires a conserved aspartate residue, but not the conserved histidine residue,  
566 for phosphatase activity (42), and EnvZ retains phosphatase activity when several other

567 residues are substituted for the histidine residue (43). Further, another *C. difficile*  
568 histidine kinase, CprK, has also exhibited potential phosphatase activity in the absence  
569 of its conserved histidine residue (30). Retention of phosphatase activity may explain  
570 why the PtpB-H664A mutant remained functional in complementation studies yet  
571 displayed a dominant negative phenotype in the parent strain. We hypothesize that the  
572 histidine residue is not required for PtpB phosphatase activity, but is required for PtpA  
573 activity. Further, PtpA, PtpB, and PtpC all contain a conserved E/DxxT/N motif in which  
574 the E/D residue is critical for kinase activity and the T/N motif is necessary for  
575 phosphatase activity (44, 45). Along with our data, the presence of this conserved motif  
576 provides additional evidence that PtpA, PtpB, and PtpC may possess dual kinase and  
577 phosphatase activities. Elucidating the molecular mechanisms by which PtpA, PtpB, and  
578 PtpC control phosphate flux to Spo0A are a focus of our future studies.

579       Regulation of *ptpA*, *ptpB*, and *ptpC* gene expression may also influence the  
580 timing of accumulation and activity of these proteins. The transition phase sigma factor  
581 SigH directly activates *ptpB* transcription (46), while the inactivation of *sigB*, a general  
582 stress response sigma factor, results in decreased *ptpA* expression and increased *ptpC*  
583 expression (47). Additionally, the catabolite control protein, CcpA, appears to indirectly  
584 repress *ptpC* expression in response to glucose (48). Altogether, the expansive list of  
585 global regulators that influence *ptpA*, *ptpB*, and *ptpC* gene expression underscore that  
586 the pathways that control Spo0A phosphorylation and dephosphorylation are under  
587 complex regulatory control. Understanding when these phosphotransfer proteins are  
588 expressed and when they are active will provide insight into what signals *C. difficile*  
589 couples to the onset of spore formation.

590       Our data demonstrate that *C. difficile* utilizes at least two nonredundant pathways  
591 to regulate Spo0A activation. This appears in contrast to *B. subtilis*, which positively  
592 controls phosphate flux from the kinases to Spo0A through the intermediate proteins,

593 Spo0F and Spo0B. To modulate the phosphate flow to Spo0A, *B. subtilis* employs  
594 several aspartyl phosphatases, which directly dephosphorylate Spo0F or Spo0A (49-51),  
595 and kinase inhibitors, which prevent KinA autophosphorylation and/or phosphotransfer  
596 (52, 53). *C. difficile* also encodes orthologous aspartyl-phosphatases and kinase inhibitor  
597 genes (11), potentially providing additional regulatory mechanisms to inhibit sporulation  
598 under specific conditions, even if the precise function or target is not conserved with *B.*  
599 *subtilis*. Although the Clostridia are hypothesized to have a simplified Spo0A activation  
600 pathway, *C. difficile* and its relatives *Clostridium acetobutylicum*, *Acetivibrio*  
601 *thermocellus*, and *C. perfringens* employ multiple, potentially dual function, histidine  
602 kinases to control Spo0A phosphorylation (13, 14, 54, 55). These results suggest that  
603 sporulation initiation is more tightly regulated in response to environmental and  
604 intracellular cues in Clostridia than previously credited.

605 As PtpA, PtpB and PtpC all inhibit sporulation, one of the biggest questions  
606 remaining is what factors are primarily responsible for Spo0A activation? The  
607 multifunctional regulator RstA positively influences Spo0A phosphorylation through an  
608 unknown molecular mechanism (28, 31). Although there is no evidence that RstA  
609 directly binds Spo0A or functions as a kinase, it remains possible that RstA  
610 phosphorylates Spo0A or an intermediate or blocks Spo0A dephosphorylation by steric  
611 hindrance. Spo0A phosphorylation may also be controlled directly by unidentified  
612 kinases. These potentially unknown kinases are difficult to predict based on knowledge  
613 from well-studied systems, as there is low conservation between clostridial or *Bacillus*  
614 spore formers. Identifying proteins that directly interact with known sporulation factors  
615 may uncover additional regulators that impact sporulation initiation, helping to unravel  
616 the regulatory pathways and molecular mechanisms that influence the ability for *C.*  
617 *difficile* transmission and survival.

618

619 **ACKNOWLEDGEMENTS**

620 We are grateful to the members of the McBride lab and Joseph Sorg for their helpful  
621 suggestions and discussions throughout the course of this work. We are also thankful to  
622 Johann Peltier for the gift of pMSR. This research was supported by the U.S. National  
623 Institutes of Health through research grants AI116933 and AI156052 to S.M.M and  
624 GM008490 to M.A.D. The content of this manuscript is solely the responsibility of the  
625 authors and does not necessarily reflect the official views of the National Institutes of  
626 Health.

627 **TABLES**

628 **Table 1. Bacterial Strains and Plasmids**

| Plasmid or Strain   | Relevant genotype or features                                                                                               | Source, construction or reference |
|---------------------|-----------------------------------------------------------------------------------------------------------------------------|-----------------------------------|
| <b>Strains</b>      |                                                                                                                             |                                   |
| <i>E. coli</i>      |                                                                                                                             |                                   |
| HB101               | F <sup>-</sup> <i>mcrB mrr hsdS20</i> (r <sub>B</sub> <sup>-</sup> m <sub>B</sub> <sup>-</sup> ) <i>recA13 leuB6 ara-14</i> | B. Dupuy                          |
| pRK24               | <i>proA2 lacY1 galK2 xyl-5 mtl-1 rpsL20</i> pRK24                                                                           |                                   |
| <i>C. difficile</i> |                                                                                                                             |                                   |
| 630Δ <i>erm</i>     | Erm <sup>S</sup> derivative of strain 630                                                                                   | Nigel Minton; (56)                |
| MC310               | 630Δ <i>erm spo0A::erm</i>                                                                                                  | (26)                              |
| MC324               | 630Δ <i>erm</i> pMC123                                                                                                      | (26)                              |
| MC674               | 630Δ <i>erm</i> Δ <i>CD1492</i>                                                                                             | (15)                              |
| MC788               | 630Δ <i>erm</i> <i>CD2492::erm</i>                                                                                          | This study                        |
| MC802               | 630Δ <i>erm</i> Δ <i>CD1492 CD2492::erm</i>                                                                                 | (21)                              |
| MC964               | 630Δ <i>erm</i> Δ <i>CD1492</i> pMC123                                                                                      | This study                        |
| MC965               | 630Δ <i>erm</i> Δ <i>CD1492</i> pMC658                                                                                      | This study                        |
| MC966               | 630Δ <i>erm</i> <i>CD2492::erm</i> pMC123                                                                                   | This study                        |
| MC967               | 630Δ <i>erm</i> <i>CD2492::erm</i> pMC658                                                                                   | This study                        |
| MC968               | 630Δ <i>erm</i> Δ <i>CD1492 CD2492::erm</i> pMC123                                                                          | This study                        |
| MC969               | 630Δ <i>erm</i> Δ <i>CD1492 CD2492::erm</i> pMC658                                                                          | This study                        |
| MC998               | 630Δ <i>erm</i> Δ <i>CD1492</i> pMC673                                                                                      | This study                        |
| MC999               | 630Δ <i>erm</i> <i>CD2492::erm</i> pMC673                                                                                   | This study                        |
| MC1000              | 630Δ <i>erm</i> Δ <i>CD1492 CD2492::erm</i> pMC673                                                                          | This study                        |
| MC1030              | 630Δ <i>erm</i> <i>CD2492::erm</i> pMC683                                                                                   | This study                        |
| MC1396              | 630Δ <i>erm</i> Δ <i>CD1492 CD2492::erm</i> pMC731                                                                          | This study                        |
| MC1646              | 630Δ <i>erm</i> Δ <i>CD1579::erm</i>                                                                                        | This study                        |
| MC1672              | 630Δ <i>erm</i> Δ <i>CD1579::erm</i> pMC123                                                                                 | This study                        |
| MC1673              | 630Δ <i>erm</i> Δ <i>CD1579::erm</i> pMC707                                                                                 | This study                        |
| MC1873              | 630Δ <i>erm</i> pMC1064                                                                                                     | This study                        |
| MC1874              | 630Δ <i>erm</i> pMC1062                                                                                                     | This study                        |
| MC1963              | 630Δ <i>erm</i> pMC1095                                                                                                     | This study                        |
| MC2024              | 630Δ <i>erm</i> pMC673                                                                                                      | This study                        |
| MC2025              | 630Δ <i>erm</i> pMC1000                                                                                                     | This study                        |
| MC2026              | 630Δ <i>erm</i> pMC658                                                                                                      | This study                        |
| MC2027              | 630Δ <i>erm</i> pMC683                                                                                                      | This study                        |
| MC2030              | 630Δ <i>erm</i> pMC707                                                                                                      | This study                        |
| MC2031              | 630Δ <i>erm</i> pMC982                                                                                                      | This study                        |
| <b>Plasmids</b>     |                                                                                                                             |                                   |
| pRK24               | Tra <sup>+</sup> , Mob <sup>+</sup> ; <i>bla</i> , <i>tet</i>                                                               | (57)                              |
| pCR2.1              | <i>bla</i> , <i>kan</i>                                                                                                     | Invitrogen                        |
| pUC19               | Cloning vector; <i>bla</i>                                                                                                  | (58)                              |
| pCE240              | <i>C. difficile</i> TargeTron® construct based on pJIR750ai (group II intron, <i>ermB::RAM</i> , <i>ltrA</i> ); <i>catP</i> | C. Ellermeier                     |
| pJIR1457            | <i>ermB</i> , <i>oriCP</i> , <i>oriEC</i> , <i>oriT</i>                                                                     | (59)                              |
| pMSR                | Pseudo-suicide plasmid used for allele exchange in <i>C. difficile</i> 630; P <i>tet</i> - <i>CD2571.1</i> , <i>catP</i>    | (22)                              |
| pIA33               | P <i>xyl::dCas9-opt</i> , P <i>gdh::sgRNA-rfp</i> , <i>catP</i>                                                             | (23)                              |
| pMC123              | <i>E. coli</i> - <i>C. difficile</i> shuttle vector; <i>bla</i> , <i>catP</i>                                               | (24)                              |

|         |                                                                                           |                  |
|---------|-------------------------------------------------------------------------------------------|------------------|
| pMC330  | pCR2.1 with group II intron targeted to <i>CD2492</i>                                     | This study       |
| pMC333  | pCE240 with <i>CD2492</i> -targeted intron                                                | This study       |
| pMC336  | pMC123 with <i>CD2492</i> -targeted intro, <i>erm::RAM ltrA catP</i>                      | This study       |
| pMC658  | pMC123 expressing <i>CD2492</i> from its native promoter                                  | This study       |
| pMC673  | pMC123 expressing <i>CD1492</i> from its native promoter                                  | This study       |
| pMC681  | pUC19 expressing <i>CD2492-H664A</i> from its native promoter                             | This study       |
| pMC683  | pMC123 expressing <i>CD2492-H664A</i> from its native promoter                            | This study       |
| pMC707  | pMC123 expressing <i>CD1579</i> from its native promoter                                  | This study       |
| pMC731  | pMC123 expressing <i>CD1492</i> and <i>CD2492</i> from their native promoters             | This study       |
| pMC982  | pMC123 expressing <i>CD1579-H372A</i> from its native promoter                            | This study       |
| pMC919  | pMSR with homology regions flanking <i>CD1579</i> and <i>ermB</i>                         | This study       |
| pMC1000 | pMC123 expressing <i>CD1492-H668A</i> from its native promoter (synthesized by Genscript) | This study       |
| pMC1062 | pIA33 with <i>sgRNA-neg</i>                                                               | This study; (23) |
| pMC1064 | pIA33 with <i>sgRNA-CD1949-3</i>                                                          | This study       |
| pMC1095 | pIA33 with <i>sgRNA-CD1949-1</i>                                                          | This study       |

---

629



630 **Table 2. Oligonucleotides**

| Primer                | Sequence (5'→3')                                                    | Use/locus tag/reference                                     |
|-----------------------|---------------------------------------------------------------------|-------------------------------------------------------------|
| oMC44                 | 5' CTAGCTGCTCCTATGTCTCACATC                                         | Forward primer for <i>rpoC</i> qPCR (24)                    |
| oMC45                 | 5' CCAGTCTCTCCTGGATCAACTA                                           | Reverse primer for <i>rpoC</i> qPCR (24)                    |
| oMC301                | 5' CAAATAATGCAGTATTTAGTCATGTG                                       | Forward primer for screening 3' crossover $\Delta CD1579$   |
| oMC304                | 5' CAGCCAACGGACTCTTCTC                                              | Reverse primer for screening 5' crossover $\Delta CD1579$   |
| oMC309                | 5' GGAGAATACAGAGATTTGATTGATTC                                       | Forward primer for PCR verification of <i>CD2492::erm</i>   |
| oMC317                | 5' AAAAGCTTTTGCACCCACGTCGATCGTGAA<br>GTGATCTTAATCGTGCGCCCAGATAGGGTG | <i>CD2492</i> IBS; similar to IBS_CD1A (16)                 |
| EBS1d_CD1A;<br>oMC318 | 5' CAGATTGTACAAATGTGGTGATAACAGATAAG<br>TCTTAATCTCTAACTTACCTTTCTTTGT | <i>CD2492</i> EBS1 (16)                                     |
| oMC319                | 5' CGCAAGTTTCTAATTTGATTATCACTCGATA<br>GAGGAAAGTGTCT                 | <i>CD2492</i> EBS2; similar to EBS2_CD1A (16)               |
| oMC331                | 5' CTCAAAGCGCAATAAATCTAGGAGC                                        | Forward primer for <i>spo0A</i>                             |
| oMC332                | 5' TTGAGTCTCTTGAAGTGGTCTAGG                                         | Reverse primer for <i>spo0A</i>                             |
| oMC338                | 5' TCCATTTGCCTTTATTTGAAGTGA                                         | Reverse primer for PCR verification of <i>CD2492::erm</i>   |
| oMC339                | 5' GGGCAAATATACTTCCTCCTCCAT                                         | Forward primer for <i>sigE</i> qPCR (26)                    |
| oMC340                | 5' TGACTTTACACTTTCATCTGTTTCTAGC                                     | Reverse primer for <i>sigE</i> qPCR (26)                    |
| oMC352                | 5' GGAGTAGGTTTAGCTTTGTTATTAGGAACC                                   | Forward primer for PCR verification of $\Delta rstA$ (32)   |
| oMC355                | 5' CTGTTGGAATATCTAGGCGATAAGC                                        | Forward primer for <i>rstA</i> qPCR (31)                    |
| oMC356                | 5' TGGTCCTCAGCCTTGTTTAATTC                                          | Reverse primer for <i>rstA</i> qPCR (31)                    |
| oMC914                | 5' GCGCGGCCGCCAGCCTTGTCATTTTTTAGAT<br>TG                            | Reverse primer for PCR verification of $\Delta CD1492$ (15) |
| oMC937                | 5' GCTTTATCAGAGGCTATGAATA                                           | Forward primer for PCR verification of $\Delta CD1492$      |
| oMC956<br>(fliCqF)    | 5' TACAAGTTGGAGCAAGTTATGGAAC                                        | Forward primer for <i>fliC</i> qPCR (60)                    |
| oMC957<br>(fliCqR)    | 5' GTTGTTATACCAGCTGAAGCCATTA                                        | Reverse primer for <i>fliC</i> qPCR (60)                    |
| oMC1201               | 5' CGTAGTGACTGGCCGAAA                                               | Forward primer for <i>CD1949</i> qPCR                       |
| oMC1202               | 5' CCCATAAACTCTATTTCCACTAGAATC                                      | Reverse primer for <i>CD1949</i> qPCR                       |
| oMC1204               | 5' TTCCACAACCTTGCTGTTATTTCTC                                        | Reverse primer for PCR verification of $\Delta rstA$ (31)   |
| oMC1481               | 5' GCATGGATCCTCTAGCAGAAAGAATTGCATG<br>ATT                           | Forward primer for <i>CD2492</i>                            |
| oMC1482               | 5' TAGCGCATGCCCTTATGATAGCCTATTTCTTA<br>CAACTTA                      | Reverse primer for <i>CD2492</i>                            |
| oMC1537               | 5' GACTCGGATCCTCAGAGGCTATGAATAGTAA<br>AGAAG                         | Forward primer for <i>CD1492</i>                            |
| oMC1538               | 5' GATGAGCATGCACGCATCAAATACAACCTAAAG<br>TAATAAA                     | Reverse primer for <i>CD1492</i>                            |

|         |                                                                              |                                                                                                        |
|---------|------------------------------------------------------------------------------|--------------------------------------------------------------------------------------------------------|
| oMC1603 | 5' GCATGGATCCAAAGATGACTATTGATAAGTAAGA<br>GA                                  | Forward primer for <i>CD1579</i>                                                                       |
| oMC1604 | 5' TAGCGCATGCAAACCTTATAAATCCGAGAACTCTAT                                      | Reverse primer for <i>CD1579</i>                                                                       |
| oMC1749 | 5' CCAATATAATCATGCAATTCTTTCTGCTAGAG<br><u>GATCCTCAGAGGCTATGAATAGTAAAGAAG</u> | Forward primer for <i>CD1492</i> to<br>Gibson assemble into pMC658                                     |
| oMC1750 | 5' CAGTCACGACGTTGTAAAACGACGGCCAGTG<br><u>AATCAACGCATCAAATACAATAAGTAATAAA</u> | Reverse primer for <i>CD1492</i> to<br>Gibson assemble into pMC658                                     |
| oMC1997 | 5' GTAGAAATACGGTGTGTTTTTTGTTACCCTAAGT<br><u>TTAAACTGCGCCAGGTGCTATTTT</u>     | Forward primer for <i>CD1579</i> (5')<br>homology region for Gibson<br>assembly                        |
| oMC1998 | 5' GGATTTTGGTCATGAGATTATCAAAAAGGAGT<br><u>TTAAACGTAACCTCAGACCACAGCTCC</u>    | Reverse primer for <i>CD1579</i> (3')<br>homology region for Gibson<br>assembly                        |
| oMC2065 | 5' CTGCGCCAGGTGCTATTTTTTG                                                    | Forward primer for screening 5'<br>crossover $\Delta CD1579$                                           |
| oMC2066 | 5' CATCCCTATATAAAGGGACGAGTC                                                  | Reverse primer for screening 3'<br>crossover $\Delta CD1579$                                           |
| oMC2139 | 5' ATAATCTCATGACCAAATCCCTTAACGATTC<br>TAACCACTACCTTTCAATGTTATTTA             | Reverse primer for overlapping<br>PCR with <i>CD1579</i> upstream<br>flanking region and <i>ermB</i>   |
| oMC2140 | 5' TAAATAACATTGAAAGGTAGTGGTTAGAATCG<br>TTAAGGGATTTTGGTCATGAGATTAT            | Forward primer for overlapping<br>PCR with <i>CD1579</i> upstream<br>flanking region and <i>ermB</i>   |
| oMC2141 | 5' TTTTAAAATTTTATTTTTTATATTTAAACCTCC<br>TTGGAAGCTGTCAGTAGTATACCT             | Reverse primer for overlapping<br>PCR with <i>CD1579</i> downstream<br>flanking region and <i>ermB</i> |
| oMC2142 | 5' AGGTATACTACTGACAGCTTCCAAGGAGGTTT<br>AAATATAAAAAATAAAATTTTAAAAA            | Forward primer for overlapping<br>PCR with <i>CD1579</i> downstream<br>flanking region and <i>ermB</i> |
| oMC2498 | 5' CATTGAAAGGTAGTGGTTAGAATATGGATACC<br>CATAATAAATATGTAAATTTT                 | Forward primer for <i>CD1579</i> -<br><i>H372A</i> site-directed mutagenesis                           |
| oMC2499 | 5' AAAATTTACATATTTATTATGGGTATCCATATT<br>CTAACCACTACCTTTCAATG                 | Reverse primer for <i>CD1579</i> -<br><i>H372A</i> site-directed mutagenesis                           |
| oMC2785 | 5' AATTAAACTGTAAATGGCCATACTATTCAGAA<br><u>ACCAAATGGTTTTAGAGCTAGAAATAGC</u>   | Forward primer for sgRNA-<br><i>CD1949-1</i> (targeting sequence<br>underlined)                        |
| oMC2787 | 5' AATTAAACTGTAAATGGCCAAGAAAATACCTA<br><u>TTACTGTCGTTTTAGAGCTAGAAATAGC</u>   | Forward primer for sgRNA-<br><i>CD1949-3</i> (targeting sequence<br>underlined)                        |
| 4084    | 5' AACTTATAGGATCCGCGGCCGCTAGTCAGAC<br>ATCATGCTGATCTAGA                       | Reverse primer for sgRNA<br>amplification (23)                                                         |
| 4238    | 5' AATTAAACTGTAAATGGCCAAGACCGCTAAA<br><u>CTGAAAGTTGTTTTAGAGCTAGAAATAGC</u>   | Forward primer for sgRNA-neg<br>amplification (targeting sequence<br>underlined) (23)                  |

632 **REFERENCES**

633

- 634 1. Ferrari FA, Trach K, LeCoq D, Spence J, Ferrari E, Hoch JA. 1985.  
635 Characterization of the *spo0A* locus and its deduced product. Proc Natl Acad  
636 Sci U S A 82:2647-51.
- 637 2. Deakin LJ, Clare S, Fagan RP, Dawson LF, Pickard DJ, West MR, Wren BW,  
638 Fairweather NF, Dougan G, Lawley TD. 2012. The *Clostridium difficile spo0A*  
639 gene is a persistence and transmission factor. Infect Immun 80:2704-11.
- 640 3. Rosenbusch KE, Bakker D, Kuijper EJ, Smits WK. 2012. *C. difficile*  
641 630Deltaerm Spo0A regulates sporulation, but does not contribute to toxin  
642 production, by direct high-affinity binding to target DNA. PLoS One 7:e48608.
- 643 4. Hoch JA. 1993. Regulation of the phosphorelay and the initiation of  
644 sporulation in *Bacillus subtilis*. Annu Rev Microbiol 47:441-65.
- 645 5. Bird TH, Grimsley JK, Hoch JA, Spiegelman GB. 1993. Phosphorylation of  
646 Spo0A activates its stimulation of in vitro transcription from the *Bacillus*  
647 *subtilis* spoIIG operon. Mol Microbiol 9:741-9.
- 648 6. Baldus JM, Green BD, Youngman P, Moran CP, Jr. 1994. Phosphorylation of  
649 *Bacillus subtilis* transcription factor Spo0A stimulates transcription from the  
650 spoIIG promoter by enhancing binding to weak 0A boxes. J Bacteriol  
651 176:296-306.
- 652 7. Fimlaid KA, Bond JP, Schutz KC, Putnam EE, Leung JM, Lawley TD, Shen A.  
653 2013. Global Analysis of the Sporulation Pathway of *Clostridium difficile*. PLoS  
654 Genet 9:e1003660.
- 655 8. Sonenshein AL. 2000. Control of sporulation initiation in *Bacillus subtilis*.  
656 Curr Opin Microbiol 3:561-6.
- 657 9. Burbulys D, Trach KA, Hoch JA. 1991. Initiation of sporulation in *B. subtilis* is  
658 controlled by a multicomponent phosphorelay. Cell 64:545-52.
- 659 10. Paredes CJ, Alsaker KV, Papoutsakis ET. 2005. A comparative genomic view  
660 of clostridial sporulation and physiology. Nat Rev Microbiol 3:969-78.
- 661 11. Edwards AN, McBride SM. 2014. Initiation of sporulation in *Clostridium*  
662 *difficile*: a twist on the classic model. FEMS Microbiol Lett 358:110-8.
- 663 12. Shen A, Edwards AN, Sarker MR, Paredes-Sabja D. 2019. Sporulation and  
664 Germination in Clostridial Pathogens. Microbiol Spectr 7.
- 665 13. Steiner E, Dago AE, Young DI, Heap JT, Minton NP, Hoch JA, Young M. 2011.  
666 Multiple orphan histidine kinases interact directly with Spo0A to control the  
667 initiation of endospore formation in *Clostridium acetobutylicum*. Mol  
668 Microbiol 80:641-54.
- 669 14. Freedman JC, Li J, Mi E, McClane BA. 2019. Identification of an Important  
670 Orphan Histidine Kinase for the Initiation of Sporulation and Enterotoxin  
671 Production by *Clostridium perfringens* Type F Strain SM101. mBio 10.
- 672 15. Childress KO, Edwards AN, Nawrocki KL, Woods EC, Anderson SE, McBride  
673 SM. 2016. The Phosphotransfer Protein CD1492 Represses Sporulation  
674 Initiation in *Clostridium difficile*. Infect Immun doi:10.1128/IAI.00735-16.
- 675 16. Underwood S, Guan S, Vijayasubhash V, Baines SD, Graham L, Lewis RJ,  
676 Wilcox MH, Stephenson K. 2009. Characterization of the sporulation

- 677 initiation pathway of *Clostridium difficile* and its role in toxin production. J  
678 Bacteriol 191:7296-305.
- 679 17. Edwards AN, Suarez JM, McBride SM. 2013. Culturing and maintaining  
680 *Clostridium difficile* in an anaerobic environment. J Vis Exp  
681 doi:10.3791/50787:e50787.
- 682 18. Sorg JA, Dineen SS. 2009. Laboratory maintenance of *Clostridium difficile*.  
683 Curr Protoc Microbiol Chapter 9:Unit9A 1.
- 684 19. Putnam EE, Nock AM, Lawley TD, Shen A. 2013. SpoIVA and SipL are  
685 *Clostridium difficile* spore morphogenetic proteins. J Bacteriol 195:1214-25.
- 686 20. Purcell EB, McKee RW, McBride SM, Waters CM, Tamayo R. 2012. Cyclic  
687 diguanylate inversely regulates motility and aggregation in *Clostridium*  
688 *difficile*. J Bacteriol 194:3307-16.
- 689 21. Edwards AN, Williams CL, Pareek N, McBride SM, Tamayo R. 2021. c-di-GMP  
690 inhibits early sporulation in *Clostridioides difficile*. BioRxiv  
691 doi:<https://doi.org/10.1101/2021.06.24.449855>.
- 692 22. Peltier J, Hamiot A, Garneau JR, Boudry P, Maikova A, Hajnsdorf E, Fortier LC,  
693 Dupuy B, Soutourina O. 2020. Type I toxin-antitoxin systems contribute to  
694 the maintenance of mobile genetic elements in *Clostridioides difficile*.  
695 Commun Biol 3:718.
- 696 23. Muh U, Pannullo AG, Weiss DS, Ellermeier CD. 2019. A Xylose-Inducible  
697 Expression System and a CRISPR Interference Plasmid for Targeted  
698 Knockdown of Gene Expression in *Clostridioides difficile*. J Bacteriol 201.
- 699 24. McBride SM, Sonenshein AL. 2011. Identification of a genetic locus  
700 responsible for antimicrobial peptide resistance in *Clostridium difficile*.  
701 Infect Immun 79:167-76.
- 702 25. Dineen SS, McBride SM, Sonenshein AL. 2010. Integration of metabolism and  
703 virulence by *Clostridium difficile* CodY. J Bacteriol 192:5350-62.
- 704 26. Edwards AN, Nawrocki KL, McBride SM. 2014. Conserved oligopeptide  
705 permeases modulate sporulation initiation in *Clostridium difficile*. Infect  
706 Immun 82:4276-91.
- 707 27. Schmittgen TD, Livak KJ. 2008. Analyzing real-time PCR data by the  
708 comparative C(T) method. Nat Protoc 3:1101-8.
- 709 28. Edwards AN, Krall EG, McBride SM. 2020. Strain-Dependent RstA Regulation  
710 of *Clostridioides difficile* Toxin Production and Sporulation. J Bacteriol 202.
- 711 29. Sebahia M, Wren BW, Mullany P, Fairweather NF, Minton N, Stabler R,  
712 Thomson NR, Roberts AP, Cerdeno-Tarraga AM, Wang H, Holden MT, Wright  
713 A, Churcher C, Quail MA, Baker S, Bason N, Brooks K, Chillingworth T, Cronin  
714 A, Davis P, Dowd L, Fraser A, Feltwell T, Hance Z, Holroyd S, Jagels K, Moule S,  
715 Mungall K, Price C, Rabbino-witsch E, Sharp S, Simmonds M, Stevens K, Unwin  
716 L, Whithead S, Dupuy B, Dougan G, Barrell B, Parkhill J. 2006. The multidrug-  
717 resistant human pathogen *Clostridium difficile* has a highly mobile, mosaic  
718 genome. Nat Genet 38:779-86.
- 719 30. Suarez JM, Edwards AN, McBride SM. 2013. The *Clostridium difficile* *cpr* locus  
720 is regulated by a noncontiguous two-component system in response to type  
721 A and B lantibiotics. J Bacteriol 195:2621-31.

- 722 31. Edwards AN, Tamayo R, McBride SM. 2016. A novel regulator controls  
723 *Clostridium difficile* sporulation, motility and toxin production. *Mol Microbiol*  
724 100:954-71.
- 725 32. Edwards AN, Anjuwon-Foster BR, McBride SM. 2019. RstA Is a Major  
726 Regulator of *Clostridioides difficile* Toxin Production and Motility. *MBio* 10.
- 727 33. Igo MM, Ninfa AJ, Stock JB, Silhavy TJ. 1989. Phosphorylation and  
728 dephosphorylation of a bacterial transcriptional activator by a  
729 transmembrane receptor. *Genes Dev* 3:1725-34.
- 730 34. Dutta R, Inouye M. 1996. Reverse phosphotransfer from OmpR to EnvZ in a  
731 kinase-/phosphatase+ mutant of EnvZ (EnvZ.N347D), a bifunctional signal  
732 transducer of *Escherichia coli*. *J Biol Chem* 271:1424-9.
- 733 35. Hoch JA. 2000. Two-component and phosphorelay signal transduction. *Curr*  
734 *Opin Microbiol* 3:165-70.
- 735 36. Brown DP, Ganova-Raeva L, Green BD, Wilkinson SR, Young M, Youngman P.  
736 1994. Characterization of spo0A homologues in diverse *Bacillus* and  
737 *Clostridium* species identifies a probable DNA-binding domain. *Mol Microbiol*  
738 14:411-26.
- 739 37. Karimova G, Pidoux J, Ullmann A, Ladant D. 1998. A bacterial two-hybrid  
740 system based on a reconstituted signal transduction pathway. *Proc Natl Acad*  
741 *Sci U S A* 95:5752-6.
- 742 38. Oliveira Paiva AM, Friggen AH, Qin L, Douwes R, Dame RT, Smits WK. 2019.  
743 The Bacterial Chromatin Protein HupA Can Remodel DNA and Associates  
744 with the Nucleoid in *Clostridium difficile*. *J Mol Biol* 431:653-672.
- 745 39. Goodman AL, Merighi M, Hyodo M, Ventre I, Filloux A, Lory S. 2009. Direct  
746 interaction between sensor kinase proteins mediates acute and chronic  
747 disease phenotypes in a bacterial pathogen. *Genes Dev* 23:249-59.
- 748 40. Liu Y, Rose J, Huang S, Hu Y, Wu Q, Wang D, Li C, Liu M, Zhou P, Jiang L. 2017.  
749 A pH-gated conformational switch regulates the phosphatase activity of  
750 bifunctional HisKA-family histidine kinases. *Nat Commun* 8:2104.
- 751 41. Freeman JA, Bassler BL. 1999. A genetic analysis of the function of LuxO, a  
752 two-component response regulator involved in quorum sensing in *Vibrio*  
753 *harveyi*. *Mol Microbiol* 31:665-77.
- 754 42. Freeman JA, Lilley BN, Bassler BL. 2000. A genetic analysis of the functions of  
755 LuxN: a two-component hybrid sensor kinase that regulates quorum sensing  
756 in *Vibrio harveyi*. *Mol Microbiol* 35:139-49.
- 757 43. Hsing W, Silhavy TJ. 1997. Function of conserved histidine-243 in  
758 phosphatase activity of EnvZ, the sensor for porin osmoregulation in  
759 *Escherichia coli*. *J Bacteriol* 179:3729-35.
- 760 44. Huynh TN, Noriega CE, Stewart V. 2010. Conserved mechanism for sensor  
761 phosphatase control of two-component signaling revealed in the nitrate  
762 sensor NarX. *Proc Natl Acad Sci U S A* 107:21140-5.
- 763 45. Willett JW, Kirby JR. 2012. Genetic and biochemical dissection of a HisKA  
764 domain identifies residues required exclusively for kinase and phosphatase  
765 activities. *PLoS Genet* 8:e1003084.

- 766 46. Saujet L, Monot M, Dupuy B, Soutourina O, Martin-Verstraete I. 2011. The key  
767 sigma factor of transition phase, SigH, controls sporulation, metabolism, and  
768 virulence factor expression in *Clostridium difficile*. *J Bacteriol* 193:3186-96.
- 769 47. Kint N, Janoir C, Monot M, Hoys S, Soutourina O, Dupuy B, Martin-Verstraete  
770 I. 2017. The alternative sigma factor sigma(B) plays a crucial role in adaptive  
771 strategies of *Clostridium difficile* during gut infection. *Environ Microbiol*  
772 19:1933-1958.
- 773 48. Antunes A, Camiade E, Monot M, Courtois E, Barbut F, Sernova NV, Rodionov  
774 DA, Martin-Verstraete I, Dupuy B. 2012. Global transcriptional control by  
775 glucose and carbon regulator CcpA in *Clostridium difficile*. *Nucleic Acids Res*  
776 40:10701-18.
- 777 49. Perego M, Hanstein C, Welsh KM, Djavakhishvili T, Glaser P, Hoch JA. 1994.  
778 Multiple protein-aspartate phosphatases provide a mechanism for the  
779 integration of diverse signals in the control of development in *B. subtilis*. *Cell*  
780 79:1047-55.
- 781 50. Ohlsen KL, Grimsley JK, Hoch JA. 1994. Deactivation of the sporulation  
782 transcription factor Spo0A by the Spo0E protein phosphatase. *Proc Natl Acad*  
783 *Sci U S A* 91:1756-60.
- 784 51. Perego M. 2001. A new family of aspartyl phosphate phosphatases targeting  
785 the sporulation transcription factor Spo0A of *Bacillus subtilis*. *Mol Microbiol*  
786 42:133-43.
- 787 52. Wang L, Grau R, Perego M, Hoch JA. 1997. A novel histidine kinase inhibitor  
788 regulating development in *Bacillus subtilis*. *Genes Dev* 11:2569-79.
- 789 53. Burkholder WF, Kurtser I, Grossman AD. 2001. Replication initiation proteins  
790 regulate a developmental checkpoint in *Bacillus subtilis*. *Cell* 104:269-79.
- 791 54. Mearls EB, Lynd LR. 2014. The identification of four histidine kinases that  
792 influence sporulation in *Clostridium thermocellum*. *Anaerobe* 28:109-19.
- 793 55. Obana N, Nakao R, Nagayama K, Nakamura K, Senpuku H, Nomura N. 2017.  
794 Immunoactive Clostridial Membrane Vesicle Production Is Regulated by a  
795 Sporulation Factor. *Infect Immun* 85.
- 796 56. Hussain HA, Roberts AP, Mullany P. 2005. Generation of an erythromycin-  
797 sensitive derivative of *Clostridium difficile* strain 630 (630 $\Delta$ erm) and  
798 demonstration that the conjugative transposon Tn916 $\Delta$ E enters the genome  
799 of this strain at multiple sites. *Journal of Medical Microbiology* 54:137-141.
- 800 57. Thomas CM, Smith CA. 1987. Incompatibility group P plasmids: genetics,  
801 evolution, and use in genetic manipulation. *Annual Reviews in Microbiology*  
802 41:77-101.
- 803 58. Yanisch-Perron C, Vieira J, Messing J. 1985. Improved M13 phage cloning  
804 vectors and host strains: nucleotide sequences of the M13mp18 and pUC19  
805 vectors. *Gene* 33:103-19.
- 806 59. Lyras D, Rood JI. 1998. Conjugative Transfer of RP4-oriT Shuttle Vectors  
807 from *Escherichia coli* to *Clostridium perfringens*. *Plasmid* 39:160-164.
- 808 60. McKee RW, Mangalea MR, Purcell EB, Borchardt EK, Tamayo R. 2013. The  
809 second messenger cyclic Di-GMP regulates *Clostridium difficile* toxin  
810 production by controlling expression of sigD. *J Bacteriol* 195:5174-85.
- 811
